# Supplementary material for: Halogenation of tyrosine perturbs large-scale protein self-organization
Source: PubMed Central journal article supplement (PMC9385671; doi:10.1038/s41467-022-32535-2), 2022-08-17
Supplement: 41467_2022_32535_MOESM3_ESM.pdf [file 41467_2022_32535_MOESM3_ESM.pdf]

## **Description Of Additional Supplementary Files**

**Supplementary Movie 1** : Selforganization of wild type FtsZ-YFPmts and halogenated FtsZ(Y222X)- YFP-mts (X = ClY, BrY, Br2Y, I2Y, Cl2Y, and IY) on supported membrane (0.5  $\mu$ M proteins, 4 mM GTP and 1 mM Mg<sup>2+</sup>).

**Supplementary Movie 2** : Selforganization dynamics of wild type FtsZ-YFP-mts and FtsZ(Y222 Cl2Y)-YFP-mts at certain proportions on supported membrane (0.5  $\mu$ M proteins, 4 mM GTP and 1 mM Mg<sup>2+</sup>)
